# Supplementary material for: Intercomparison of IAGOS-CORE, IAGOS-CARIBIC and WMO/GAW-WCCOS Ozone Instruments at the Environmental Simulation Facility at Jülich, Germany
Source: Copernicus journal article supplement (doi:10.5194/amt-18-4985-2025), 2025-10-01
Supplement: Supplementary file 1 [file amt-18-4985-2025-supplement.pdf]

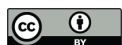

*Supplement of*

**Intercomparison of IAGOS-CORE, IAGOS-CARIBIC and WMO/GAW-WCCOS Ozone Instruments at the Environmental Simulation Facility at Jülich, Germany**

**Herman G. J. Smit et al.**

*Correspondence to:* Herman G. J. Smit ([h.smit@fz-juelich.de](mailto:h.smit@fz-juelich.de))

The copyright of individual parts of the supplement might differ from the article licence.

20

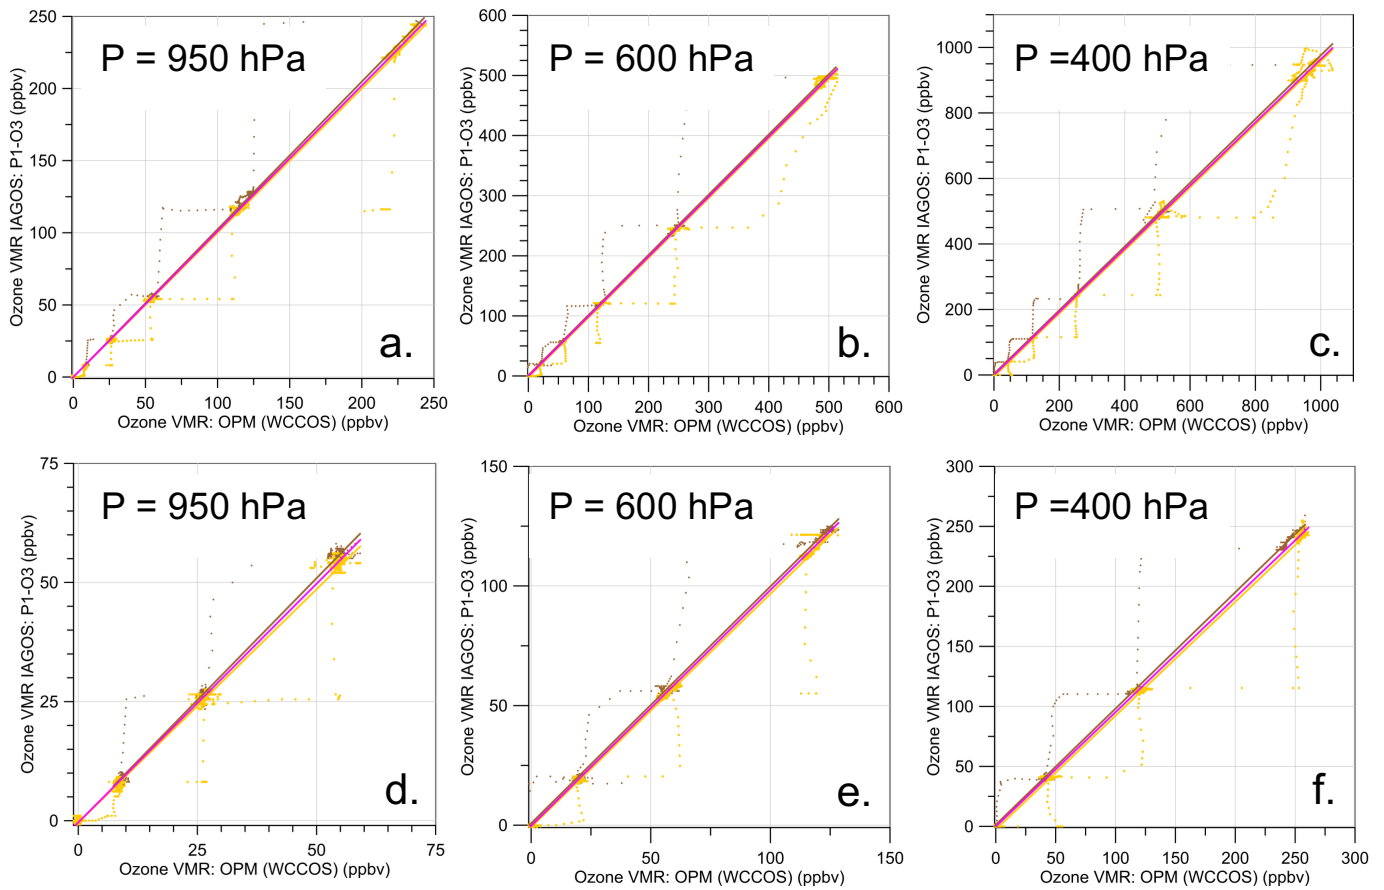

25 **Figure S1. Experiment #7: Ozone pressures measured by IAGOS P1-O3 instrument versus OPM at different ozone VMR levels (ppbv) for three discrete constant air pressure levels: 950, 600 and 400 hPa. Displayed are the scatter plots of P1-O3 versus OPM for all data (magenta), upward ozone levels (yellow) and downward ozone levels (orange). The solid straight lines are their linear fits. Upper panel displays the full ozone ranges (graphs a., b., c.) and the lower panel the lower ozone ranges (graphs d., e., f.) at the three different air pressure levels.**

30

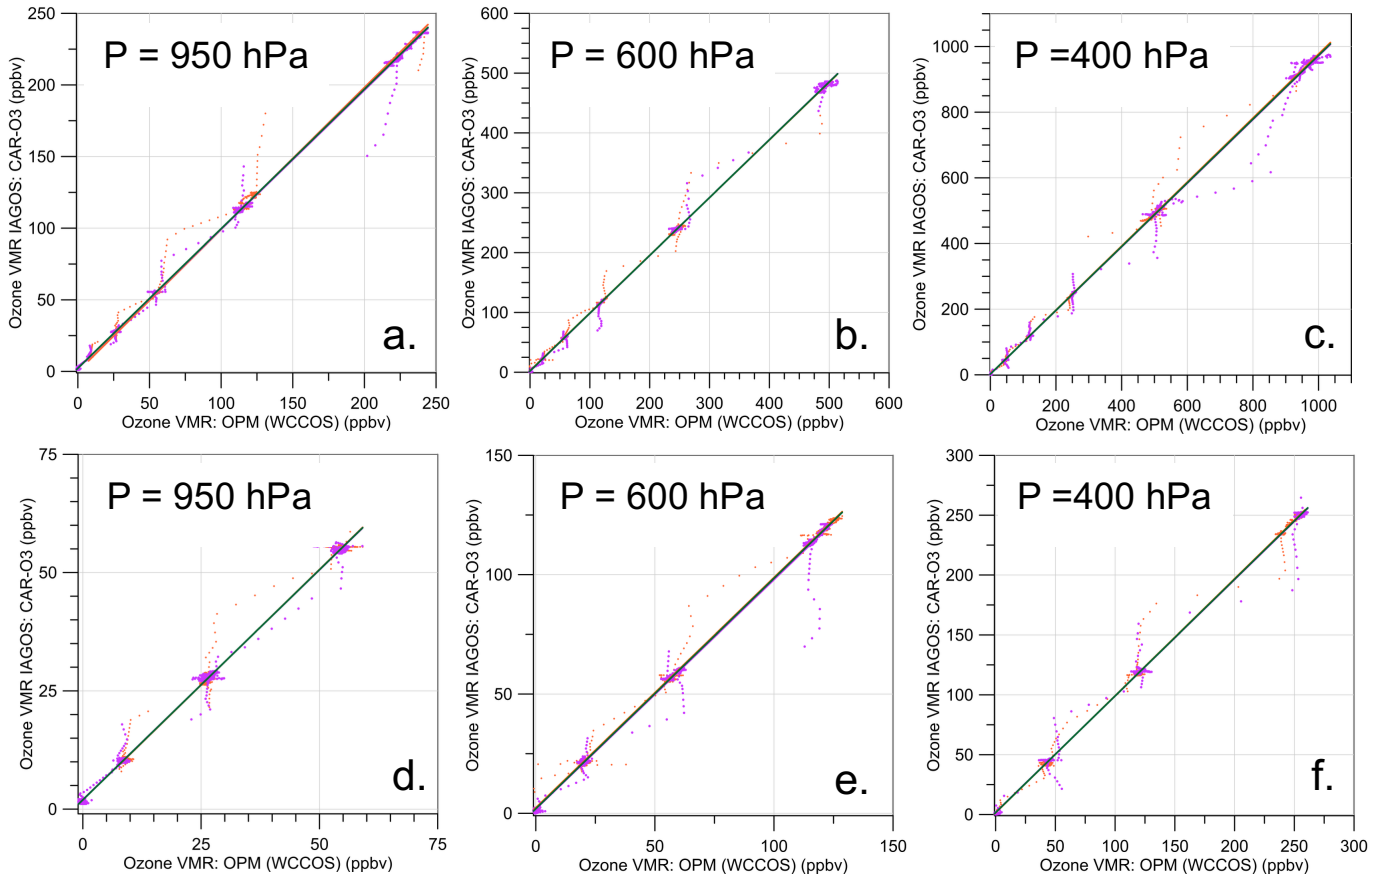

**Figure S2. Experiment #7: Ozone pressures measured by IAGOS CAR-O3 instrument versus OPM at different ozone VMR levels (ppbv) for three discrete constant air pressure levels: 950, 600 and 400 hPa. Displayed are the scatter plots of CAR-O3 versus OPM for all data (green), upward ozone levels (purple) and downward ozone levels (brown). The solid straight lines are their linear fits. Upper panel displays the full ozone ranges (graphs a., b., c.) and the lower panel the lower ozone ranges (graphs d., e., f.) at the three different air pressure levels.**
